# Supplementary material
Source: HighWire-hosted journal article supplement (https://ajnr-sso.highwirestaging.com/highwire/filestream/52031/field_highwire_adjunct_files/0/0732.pdf)
Supplement: 0732.pdf [file 0732.pdf]

**On-line Table: Association of clinical and radiologic variables with hospital mortality\***

| Variable                                                                       | Alive (n = 40)                    | Dead (n = 16)                       | OR (95% CI)              | P Value <sup>†</sup> |
|--------------------------------------------------------------------------------|-----------------------------------|-------------------------------------|--------------------------|----------------------|
| Age (yrs)                                                                      | 62.6 ± 14.8                       | 63.3 ± 15.7                         |                          | .892                 |
| Sex, male                                                                      | 60.0% (24)                        | 68.8% (11)                          | 1.47 (0.37–6.41)         | .541                 |
| <b>Time from symptom onset to initial NCCT/CTA/CECT at our institution (h)</b> | <b>Median, 12.5; IQR, 6.5–36</b>  | <b>Median, 10.0; IQR, 2–15.5</b>    |                          | <b>.201</b>          |
| Clinical variables                                                             |                                   |                                     |                          |                      |
| Hypertension                                                                   | 80.0% (32)                        | 75.0% (12)                          | 0.75 (0.16–4.07)         | .680                 |
| Hyperlipidemia                                                                 | 30.0% (12)                        | 43.8% (7)                           | 1.81 (0.45–6.99)         | .326                 |
| Diabetes                                                                       | 20.0% (8)                         | 31.3% (5)                           | 1.82 (0.38–7.94)         | .368                 |
| Smoking                                                                        | 25.0% (10)                        | 25.0% (4)                           | 1 (0.19–4.40)            | 1.000                |
| Alcohol                                                                        | 30.0% (12)                        | 12.5% (2)                           | 0.33 (0.03–1.86)         | .172                 |
| <b>INR</b>                                                                     | <b>1.0 ± 0.2</b>                  | <b>1.2 ± 0.3</b>                    |                          | <b>.040</b>          |
| aPTT (s)                                                                       | 25.6 ± 5.2                        | 27.7 ± 5.5                          |                          | .197                 |
| Platelet count (10 <sup>9</sup> )                                              | 231.3 ± 65.8                      | 193.8 ± 72.9                        |                          | .186                 |
| SBP (mm Hg)                                                                    | 165.5 ± 41.6                      | 168.8 ± 35.5                        |                          | .766                 |
| DBP (mm Hg)                                                                    | 88.3 ± 24.1                       | 86.5 ± 16.3                         |                          | .752                 |
| MAP (mm Hg)                                                                    | 114.1 ± 28.3                      | 114.0 ± 21.6                        |                          | .994                 |
| Clinical score                                                                 |                                   |                                     |                          |                      |
| <b>GCS score</b>                                                               | <b>12.2 ± 3.3</b>                 | <b>10.0 ± 4.1</b>                   |                          | <b>.071</b>          |
| <b>ICH Score</b>                                                               | <b>1.5 (IQR, 1–2; range, 0–4)</b> | <b>2 (IQR, 1.5–2.5; range, 1–5)</b> |                          | <b>.010</b>          |
| NCCT findings                                                                  |                                   |                                     |                          |                      |
| Hematoma, infratentorial                                                       | 17.5% (7)                         | 12.5% (2)                           | 1.48 (0.24–16.29)        | .645                 |
| <b>Large hematoma size (&gt;30 mL)</b>                                         | <b>25.0% (10)</b>                 | <b>50.0% (8)</b>                    | <b>3.00 (0.75–11.90)</b> | <b>.070</b>          |
| <b>"Swirl sign"</b>                                                            | <b>15.0% (6)</b>                  | <b>43.8% (7)</b>                    | <b>4.41 (0.97–20.01)</b> | <b>.021</b>          |
| Intraventricular blood                                                         | 55.0% (22)                        | 62.5% (10)                          | 1.36 (0.36–5.48)         | .608                 |
| Hydrocephalus                                                                  | 45.0% (18)                        | 50.0% (8)                           | 1.22 (0.33–4.57)         | .735                 |
| Herniation                                                                     | 45.0% (18)                        | 43.8% (7)                           | 0.95 (0.25–3.55)         | .932                 |
| <b>CTA extravasation</b>                                                       | <b>10.0% (4)</b>                  | <b>37.5% (6)</b>                    | <b>5.40 (1.01–30.44)</b> | <b>.015</b>          |
| <b>CECT extravasation</b>                                                      | <b>15.0% (6)</b>                  | <b>43.8% (7)</b>                    | <b>4.41 (0.97–20.01)</b> | <b>.021</b>          |
| Treatment                                                                      |                                   |                                     |                          |                      |
| Antihypertensive medications                                                   | 82.5% (33)                        | 75.0% (12)                          | 0.64 (0.13–3.54)         | .523                 |
| Osmotic agents                                                                 | 20.0% (8)                         | 31.3% (5)                           | 1.82 (0.38–7.94)         | .368                 |
| EVD                                                                            | 27.5% (11)                        | 50.0% (8)                           | 2.64 (0.67–10.29)        | .108                 |
| Craniectomy                                                                    | 2.5% (1)                          | 0% (0)                              | 0 (0)                    | .523                 |

**Note:**—OR indicates odds ratio; CI, confidence interval; IQR, interquartile range; aPTT, activated partial thromboplastin time; SBP, systolic blood pressure; DBP, diastolic blood pressure; MAP, mean arterial pressure; EVD, external ventricular drain.

\* Parentheses indicate absolute numbers of patients or 95% CIs for ORs. For continuous variables, mean ± SD is reported. For ICH score, mean, IQR, and range are reported. Variables in bold were retained for multivariate backward stepwise logistic regression analysis, which showed only the presence of active extravasation on CTA and/or CECT to remain significant in prediction of death.

<sup>†</sup> P values for univariate analysis were determined by  $\chi^2$  test for categorical variables and Wilcoxon rank sum test for continuous variables.
